# Supplementary material
Source: PubMed Central journal article supplement (PMC1885612)

**a**

MIP-2 (pg/ml)

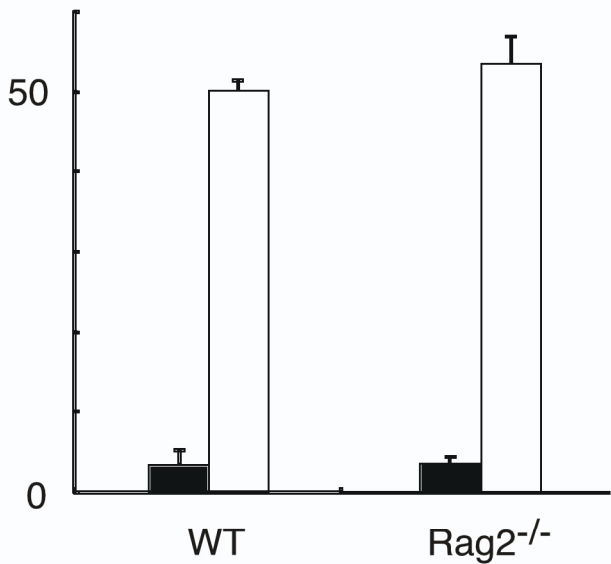

Supplement: pnas_0609014104_1.pdf [file pnas_0609014104_1.pdf]

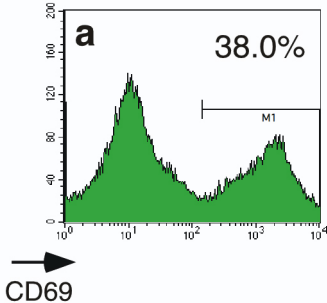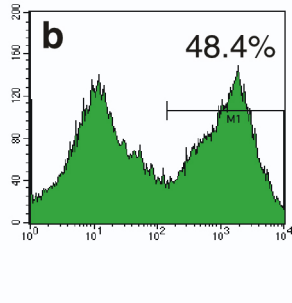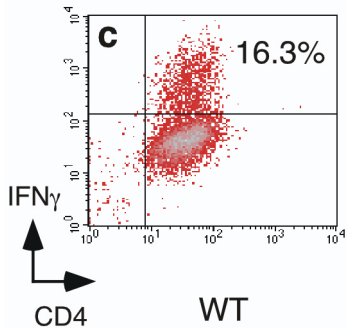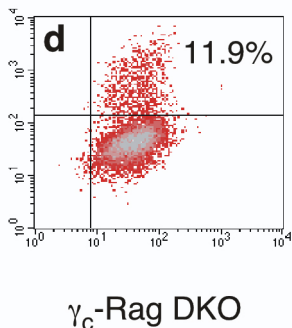

Supplement: pnas_0609014104_10.pdf [file pnas_0609014104_10.pdf]

(pg/ml)

300

200

100

0

MOI

0

5

20

50

100

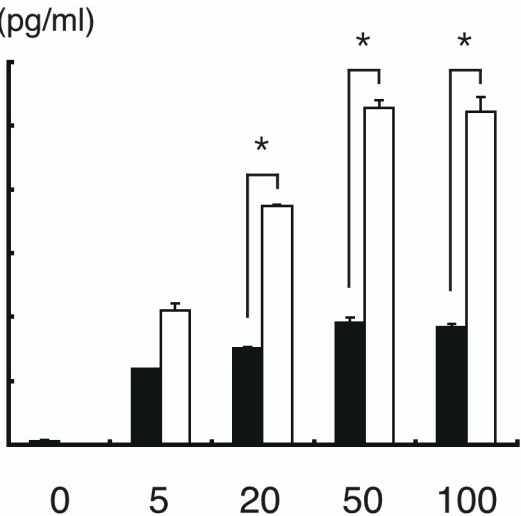

Supplement: pnas_0609014104_11.pdf [file pnas_0609014104_11.pdf]

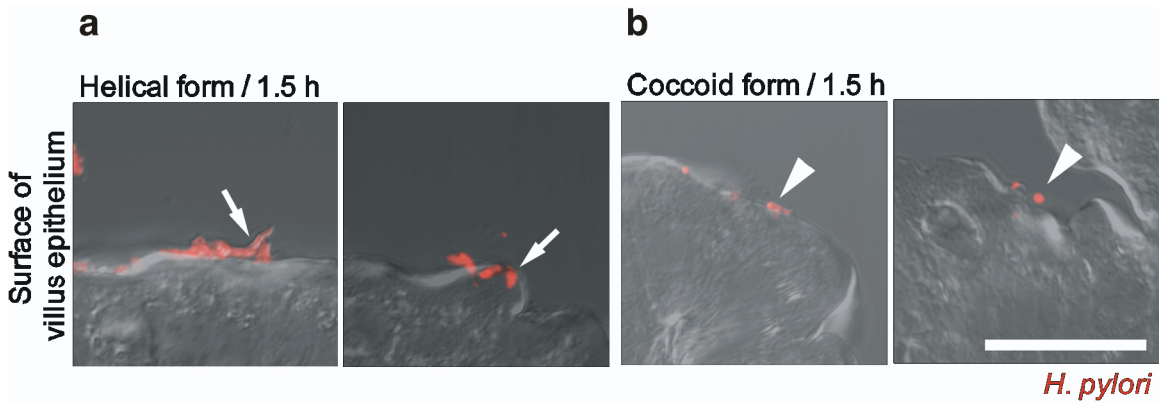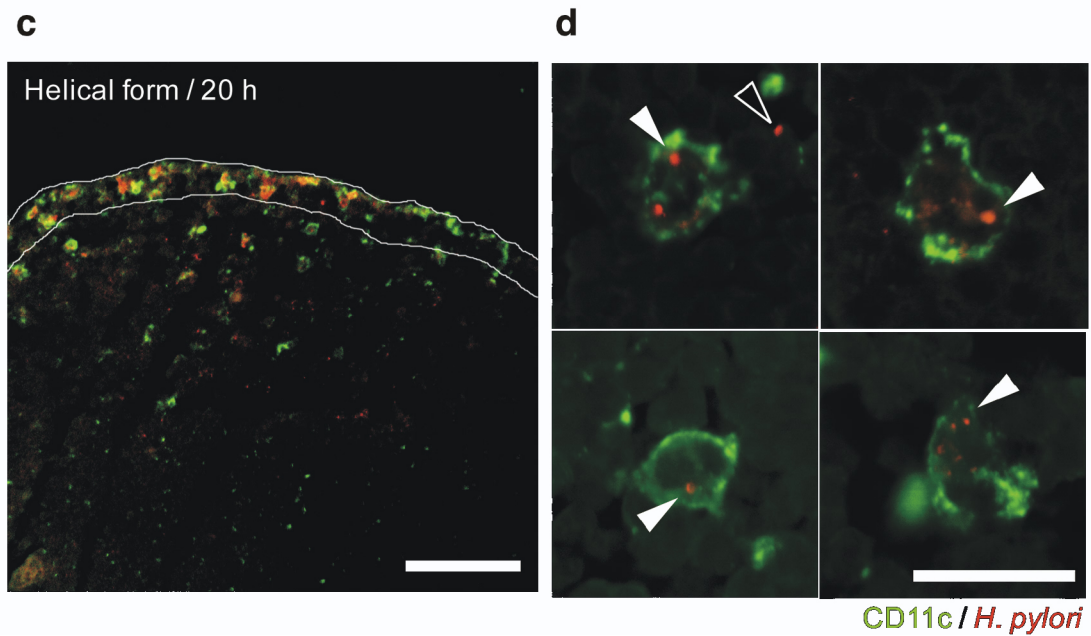

Supplement: pnas_0609014104_12.pdf [file pnas_0609014104_12.pdf]

**b**

MIP-2 (pg/ml)

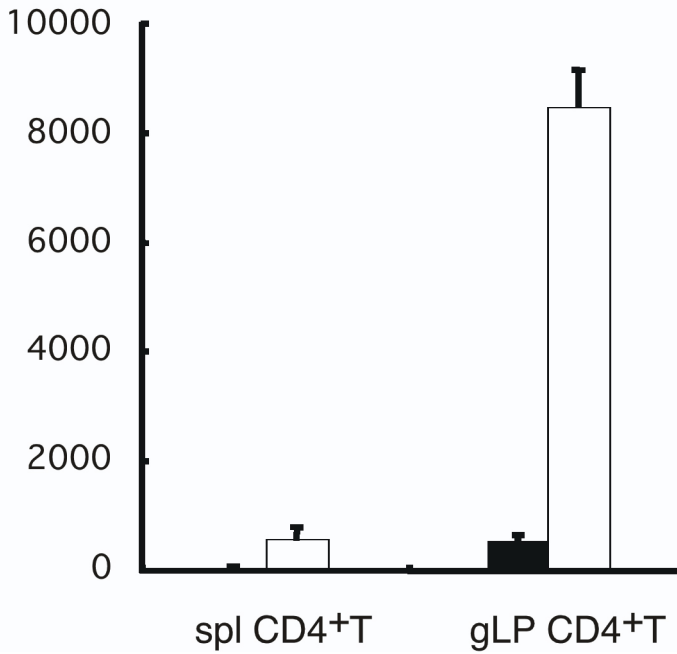

Supplement: pnas_0609014104_2.pdf [file pnas_0609014104_2.pdf]

**a** WT ← vehicle

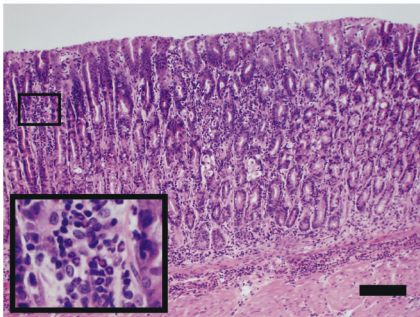

Supplement: pnas_0609014104_3.pdf [file pnas_0609014104_3.pdf]

**b** WT  $\leftarrow$   $\alpha$ CD4 Ab

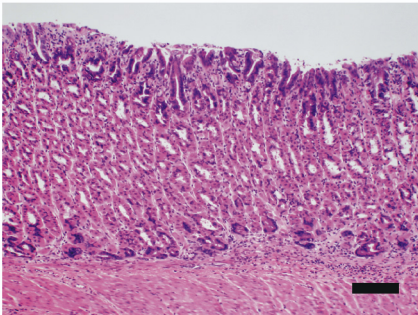

Supplement: pnas_0609014104_4.pdf [file pnas_0609014104_4.pdf]

**c** Rag2<sup>-/-</sup> ← OT-II-Rag CD4<sup>+</sup>T

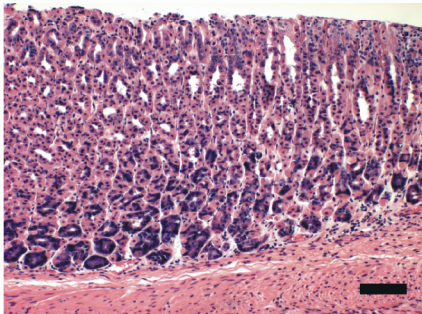

Supplement: pnas_0609014104_5.pdf [file pnas_0609014104_5.pdf]

**d** OT-II-Rag

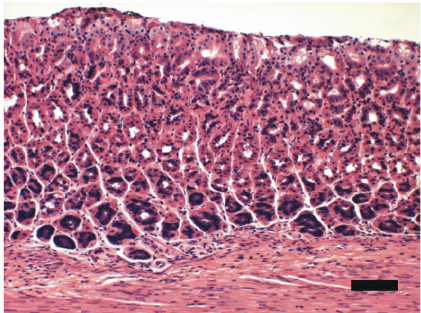

Supplement: pnas_0609014104_6.pdf [file pnas_0609014104_6.pdf]

**e** OT-II-Rag  $\leftarrow$  OVA

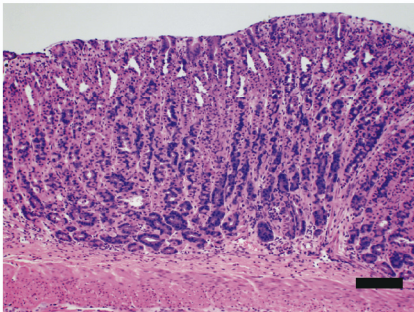

Supplement: pnas_0609014104_7.pdf [file pnas_0609014104_7.pdf]

**a**  $\gamma_c$ -Rag DKO  $\leftarrow$  NK

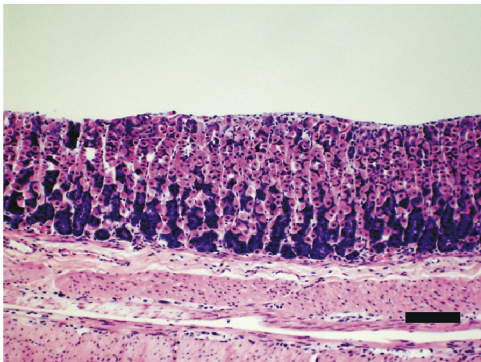

Supplement: pnas_0609014104_8.pdf [file pnas_0609014104_8.pdf]

**b**  $\gamma_C$ -Rag DKO  $\leftarrow$  NK + CD4<sup>+</sup>T

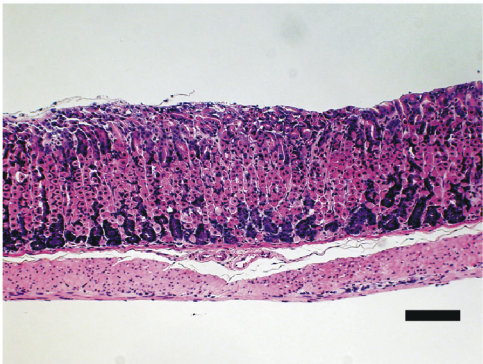

Supplement: pnas_0609014104_9.pdf [file pnas_0609014104_9.pdf]
